# Supplementary material
Source: MDPI journal article supplement (https://www.mdpi.com/2076-3298/7/4/25)
Supplement: s1 [file s1]

# Supplementary Materials

Article

## Revised Estimation Method for Emissions from Automated Plunger Lift Liquid Unloadings

Adam Pacsi <sup>1</sup>, David W. Sullivan <sup>2</sup> and David T. Allen <sup>2,\*</sup>

<sup>1</sup> Chevron U.S.A. Inc., Houston, TX 77002, USA; adam.pacsi@chevron.com

<sup>2</sup> Center for Energy and Environmental Resources, The University of Texas at Austin, Austin, TX 78758, USA; sullivan231@mail.utexas.edu

\* Correspondence: allen@che.utexas.edu

### Method 3 Derivation

This section outlines the derivation of the version of the EPA Method 3 estimation method used for a single well with short duration venting events (<30 min). The EPA estimate in CFR 98.233 [1] is:

$$E = \sum_{p=1}^W \left[ V_p \times \left( (0.37 \times 10^{-3}) \times TD_p^2 \times WD_p \times SP_p \right) + \sum_{q=1}^{V_p} SFR_p \times (HR_{p,q} - 0.5) \times Z_{p,q} \right] \quad (S1)$$

where  $E$  is annual standard cubic feet (scf) of natural gas emitted,  $W$  is the total number of wells with plunger lift assist and venting for a company in a sub-basin,  $TD_p$  is the tubing diameter for each well in inches,  $WD_p$  is the tubing depth in the well to the plunger bumper in feet,  $SP_p$  is the flow line pressure in psia for the well,  $V_p$  is the annual number of unloading events for a well in a year,  $SFR_p$  is the average production rate of the well in scf/h,  $HR_{p,q}$  is the hours for each venting event  $q$  that the well was left open to the atmosphere, and  $Z_{p,q}$  is equal to 1 if  $HR_{p,q}$  is greater than 0.5 and 0 if  $HR_{p,q}$  is less than 0.5. The part of the equation before the addition sign is the volume of gas in the wellbore while the part after the addition sign describes an emissions rate at the production rate of the well if the event exceeds half an hour.

For a single well ( $W=1$ ) in which all events are less than 0.5 hours, as would be expected with high venting frequency wells with plunger lift assist [2,3], the emissions per event for the well ( $E/V_p$ ) would only be a function of the volume of gas in the wellbore since  $Z_{p,q}$  would always be equal to zero. Thus, the Method 3 equation used in this work for high venting frequency wells with plunger lift is as follows:

$$\frac{E}{V_p} = \frac{scf}{event} = (0.37 \times 10^{-3}) \times TD_p^2 \times WD_p \times SP_p \quad (S2)$$

### Orifice Co-Efficient Derivation

The general equation for the velocity ( $v_0$ ) of flow through an orifice [4] is:

$$v_0 = \frac{C_0}{\sqrt{1 - \left(\frac{D_0}{D_1}\right)^4}} \sqrt{\frac{2(p_1 - p_2)}{\rho}} \quad (S3)$$

Assuming the dimensionless orifice coefficient  $C_0$ , the pipe diameter  $D_1$ , the orifice diameter  $D_0$ , and the density of the fluid  $\rho$  are constant whether the flow is for production or for venting during the liquid unloading, the ratio of the velocities between the two flow conditions would only be a function of the square root of the pressure drop across the orifice at the wellhead:

$$\frac{v_{venting}}{v_{production}} = \frac{\sqrt{(P_{shut} - P_{atm})}}{\sqrt{(P_{line} - P_{sep})}} \quad (S4)$$

where  $P_{shut}$  is the shut-in pressure to which the well builds while the plunger is dropped in psia,  $P_{atm}$  is the local atmospheric pressure and is assumed to be 14.7 psia in this study,  $P_{line}$  is the normal line pressure for the well during production in psia, and  $P_{sep}$  is the separator pressure in psia. This ratio is used to scale the duration of the venting and the gas production rate of the well to account for the increased pressure drop during venting compared to routine production activities through the separator.

### Measures of Bias Used in This Work

Mean Bias (MB):

$$MB = \frac{1}{n} \sum_{i=1}^n (x_{predicted} - x_{measured}) \quad (S5)$$

Mean Normalized Bias (MNB):

$$MNB = \frac{1}{n} \sum_{i=1}^n \frac{(x_{predicted} - x_{measured})}{x_{measured}} \quad (S6)$$

**Table S1.** Well parameters, measured emissions data [2,3], and predictions for automated plunger lift wells used in analysis presented in this work.

| Measurement Metadata from Allen et al. [2] for Automated Plunger Lift Wells |                      |                 |                      |                               |                             |                           | scf Whole Gas/Event          |          |                |
|-----------------------------------------------------------------------------|----------------------|-----------------|----------------------|-------------------------------|-----------------------------|---------------------------|------------------------------|----------|----------------|
| Well Code                                                                   | Tubing Diameter (in) | Well Depth (ft) | Line Pressure (psig) | Gas Production Rate (scf/day) | Avg. Venting Duration (sec) | Methane % in Produced Gas | Measured in Allen et al. [2] | Method 3 | Revised Method |
| UBB-42-0101                                                                 | 2.38                 | 6625            | 170                  | 170,000                       | 147                         | 75.7                      | 1207                         | 2554     | 723            |
| UBB-42-0201                                                                 | 2.38                 | 6770            | 160                  | 100,000                       | 1208                        | 78.7                      | 10954                        | 2468     | 3490           |
| UBB-42-0401                                                                 | 2.38                 | 4416            | 210                  | 200,000                       | 389                         | 81.9                      | 78                           | 2074     | 2263           |
| UBB-42-0501                                                                 | 2.38                 | 6893            | 135                  | 140,000                       | 130                         | 82.9                      | 795                          | 2154     | 523            |
| UBB-42-0601                                                                 | 2.38                 | 4600            | 135                  | 140,000                       | 1208                        | 83.4                      | 8727                         | 1437     | 4862           |
| UBB-42-0701                                                                 | 2.38                 | 5061            | 148                  | 170,000                       | 276                         | 81.1                      | 127                          | 1720     | 1353           |
| UBB-42-0801                                                                 | 2.38                 | 4782            | 155                  | 155,000                       | 433                         | 80.5                      | 2106                         | 1694     | 1937           |
| UBB-42-1001                                                                 | 2.38                 | 7630            | 102                  | 162,000                       | 36                          | 91.5                      | 228                          | 1863     | 166            |
| UBB-42-1101                                                                 | 2.38                 | 6756            | 175                  | 175,000                       | 262                         | 80                        | 1918                         | 2675     | 1328           |
| UBB-42-1201                                                                 | 2.38                 | 6696            | 95                   | 90,000                        | 617                         | 80.4                      | 760                          | 1533     | 1576           |
| UBB-43-0101                                                                 | 2.38                 | 6689            | 165                  | 180,000                       | 177                         | 78.5                      | 1651                         | 2509     | 921            |

|             |      |      |     |         |     |      |      |      |     |
|-------------|------|------|-----|---------|-----|------|------|------|-----|
| UBB-43-0301 | 2.38 | 6695 | 190 | 190,000 | 137 | 81.7 | 78   | 2860 | 755 |
| UBB-50-2601 | 2.00 | 3310 | 12  | 54,000  | 317 | 76.8 | 1191 | 132  | 406 |
| UBB-50-2701 | 2.00 | 3247 | 13  | 47,000  | 849 | 77.7 | 2571 | 130  | 949 |
| UBB-50-2801 | 2.00 | 2935 | 12  | 32,000  | 33  | 78.2 | 72   | 116  | 25  |
| UBB-50-2901 | 2.00 | 2786 | 15  | 15,000  | 90  | 83   | 1196 | 121  | 33  |
| UBB-50-3001 | 2.00 | 2455 | 26  | 26,000  | 692 | 81.9 | 289  | 145  | 465 |
| UBB-50-3101 | 2.00 | 3067 | 13  | 46,000  | 73  | 80.6 | 72   | 125  | 80  |
| UBB-50-3201 | 2.00 | 3087 | 12  | 46,000  | 309 | 76.6 | 1730 | 121  | 336 |
| UEF-49-0501 | 2.38 | 8783 | 70  | 18,000  | 123 | 82.4 | 519  | 1553 | 62  |
| UEY-41-0101 | 2.38 | 4174 | 62  | 38,000  | 400 | 97.8 | 319  | 668  | 422 |
| UEY-41-0201 | 2.38 | 4402 | 7   | 90,000  | 274 | 97.8 | 132  | 199  | 543 |
| UEY-41-0301 | 2.38 | 5038 | 25  | 129,000 | 191 | 97.8 | 220  | 417  | 636 |
| UEY-41-0401 | 2.38 | 4098 | 93  | 107,000 | 206 | 97.8 | 561  | 921  | 625 |

## References

1. Electronic Code of Federal Regulations, Title 40: Protection of Environment, Part 98: Mandatory Greenhouse Gas Reporting, Subpart W: Petroleum and Natural Gas Systems. Available online: <https://www.ecfr.gov/cgi-bin/text-idx?SID=555cd31d46a2d3217eeb4b4e3ec4571a&mc=true&node=sp40.23.98.w&rgn=div6> (accessed on 30 December 2019).
2. Allen, D.T.; Sullivan, D.W.; Zavala-Araiza, D.; Pacsi, A.P.; Harrison, M.; Keen, K.; Fraser, M.P.; Hill, A.D.; Lamb, B.K.; Sawyer, R.F.; et al. Methane emissions from process equipment at natural gas production sites in the United States: Liquid unloadings. *Environ. Sci. Technol.* **2015**, *49*, 641–648.
3. Methane—Pneumatics and Liquid Unloadings Study Home. Available online: <http://dept.ceer.utexas.edu/methane2/study/> (accessed on 30 December 2019).
4. Geankoplis, C.J. *Transport Processes and Separation Process Principles*, 4th ed.; Prentice Hall: New Jersey, NJ, USA, 2007; p. 40.
